# Supplementary material for: Results of multigene panel testing in familial cancer cases without genetic cause demonstrated by single gene testing
Source: PubMed Central journal article supplement (PMC6898579; doi:10.1038/s41598-019-54517-z), 2019-12-06
Supplement: 41598_2019_54517_MOESM1_ESM.pdf [file 41598_2019_54517_MOESM1_ESM.pdf]

Results of multigene panel testing in familial cancer cases without genetic cause demonstrated by single gene testing

Mev Dominguez-Valentin<sup>1</sup>, Sigve Nakken<sup>1,14</sup>, H el ene Tubeuf<sup>2,3</sup>, Daniel Vodak<sup>1</sup>, Per Olaf Ekstr om<sup>1</sup>, Anke M. Nissen<sup>4,5</sup>, Monika Morak<sup>4,5</sup>, Elke Holinski-Feder<sup>4,5</sup>, Arild Holth<sup>6</sup>, Gabriel Capella<sup>7</sup>, Ben Davidson<sup>6,8</sup>, D. Gareth Evans<sup>9,10</sup>, Alexandra Martins<sup>2</sup>, P al M oller<sup>1,11,12</sup>, Eivind Hovig<sup>1,13</sup>

Supplementary Table 1. Illumina TruSight target design information for the 44 cancer gene panel including the target region region, chromosom start and stop coordinate, lenght for each targeted gene region, SNP count and the coverage of the design for each target gene region.

| Target Gene Region                        | Chromosome | Start Coordinate | Stop Coordinate | Length | Amplicons | SNP Count | Coverage |
|-------------------------------------------|------------|------------------|-----------------|--------|-----------|-----------|----------|
| APC                                       | 5          | 112173225        | 112181961       | 8737   | 32        | 34        | 100      |
| APC                                       | 5          | 112073531        | 112074182       | 652    | 3         | 2         | 100      |
| APC_Ex_2021042 + Ex_2018339 +Exon_2019565 | 5          | 112162805        | 112164669       | 1865   | 4         | 0         | 59       |
| APC_Exon_2017752                          | 5          | 112116487        | 112116600       | 114    | 1         | 0         | 100      |
| APC_Exon_2017753                          | 5          | 112170648        | 112170862       | 215    | 1         | 0         | 100      |
| APC_Exon_2018122                          | 5          | 112102023        | 112102107       | 85     | 1         | 2         | 100      |
| APC_Exon_2018123                          | 5          | 112136976        | 112137080       | 105    | 1         | 6         | 100      |
| APC_Exon_2018179                          | 5          | 112102886        | 112103087       | 202    | 1         | 0         | 100      |
| APC_Exon_2018180 + Exon_2018180           | 5          | 112151042        | 112151440       | 399    | 2         | 0         | 100      |
| APC_Exon_2018864                          | 5          | 112157593        | 112157688       | 96     | 1         | 0         | 100      |
| APC_Exon_2019978                          | 5          | 112111326        | 112111434       | 109    | 1         | 0         | 100      |
| APC_Exon_2020381                          | 5          | 112154663        | 112155041       | 379    | 2         | 0         | 100      |
| APC_Exon_2021041                          | 5          | 112043202        | 112043579       | 378    | 2         | 2         | 100      |
| APC_Exon_2265614                          | 5          | 112090570        | 112090722       | 153    | 1         | 12        | 100      |
| APC_Exon_2267008                          | 5          | 112128143        | 112128226       | 84     | 1         | 4         | 100      |
| ATM                                       | 11         | 108143234        | 108143604       | 371    | 2         | 2         | 100      |
| ATM                                       | 11         | 108235784        | 108239851       | 4068   | 11        | 16        | 77       |
| ATM                                       | 11         | 108202146        | 108202789       | 644    | 2         | 0         | 90       |
| ATM                                       | 11         | 108098297        | 108098640       | 344    | 1         | 4         | 100      |
| ATM                                       | 11         | 108186525        | 108186865       | 341    | 2         | 4         | 100      |
| ATM                                       | 11         | 108159679        | 108160553       | 875    | 3         | 2         | 100      |

|                                 |    |           |           |     |   |    |     |
|---------------------------------|----|-----------|-----------|-----|---|----|-----|
| ATM                             | 11 | 108141725 | 108142249 | 525 | 1 | 0  | 47  |
| ATM + Exon_1950810              | 11 | 108163321 | 108164254 | 934 | 4 | 2  | 100 |
| ATM + Exon_1955421              | 11 | 108196012 | 108197002 | 991 | 4 | 10 | 100 |
| ATM_Exon_1950050                | 11 | 108099855 | 108100100 | 246 | 1 | 0  | 100 |
| ATM_Exon_1950051                | 11 | 108119610 | 108119879 | 270 | 1 | 0  | 100 |
| ATM_Exon_1950553                | 11 | 108158327 | 108158442 | 116 | 1 | 2  | 100 |
| ATM_Exon_1950554                | 11 | 108165654 | 108165786 | 133 | 1 | 2  | 100 |
| ATM_Exon_1950567                | 11 | 108115515 | 108115753 | 239 | 1 | 6  | 100 |
| ATM_Exon_1950568                | 11 | 108117691 | 108117854 | 164 | 1 | 0  | 100 |
| ATM_Exon_1950569                | 11 | 108122564 | 108122758 | 195 | 1 | 0  | 100 |
| ATM_Exon_1950570                | 11 | 108123544 | 108123639 | 96  | 1 | 0  | 100 |
| ATM_Exon_1950572                | 11 | 108183138 | 108183225 | 88  | 1 | 0  | 100 |
| ATM_Exon_1950725                | 11 | 108175402 | 108175579 | 178 | 1 | 0  | 100 |
| ATM_Exon_1950811                | 11 | 108190681 | 108190785 | 105 | 1 | 2  | 100 |
| ATM_Exon_1950812 + Exon_1950812 | 11 | 108191928 | 108192247 | 320 | 1 | 0  | 100 |
| ATM_Exon_1950813                | 11 | 108198372 | 108198485 | 114 | 1 | 0  | 100 |
| ATM_Exon_1950901                | 11 | 108128208 | 108128333 | 126 | 1 | 0  | 100 |
| ATM_Exon_1950903                | 11 | 108168014 | 108168109 | 96  | 1 | 0  | 100 |
| ATM_Exon_1950904                | 11 | 108224493 | 108224607 | 115 | 1 | 2  | 100 |
| ATM_Exon_1950977                | 11 | 108151722 | 108151895 | 174 | 1 | 0  | 100 |
| ATM_Exon_1950978                | 11 | 108153437 | 108153606 | 170 | 1 | 4  | 100 |
| ATM_Exon_1950979                | 11 | 108170441 | 108170612 | 172 | 1 | 0  | 100 |
| ATM_Exon_1950980                | 11 | 108200941 | 108201148 | 208 | 1 | 0  | 100 |
| ATM_Exon_1950981                | 11 | 108216470 | 108216635 | 166 | 1 | 0  | 100 |
| ATM_Exon_1951064                | 11 | 108121428 | 108121799 | 372 | 2 | 2  | 100 |
| ATM_Exon_1951065                | 11 | 108124541 | 108124766 | 226 | 1 | 4  | 100 |
| ATM_Exon_1951146                | 11 | 108106397 | 108106561 | 165 | 1 | 2  | 100 |
| ATM_Exon_1951147                | 11 | 108139137 | 108139336 | 200 | 1 | 14 | 100 |
| ATM_Exon_1951149                | 11 | 108172375 | 108172516 | 142 | 1 | 0  | 100 |
| ATM_Exon_1951150                | 11 | 108178624 | 108178711 | 88  | 1 | 0  | 100 |
| ATM_Exon_1951240                | 11 | 108218006 | 108218092 | 87  | 1 | 2  | 100 |
| ATM_Exon_1952318                | 11 | 108150218 | 108150335 | 118 | 1 | 2  | 100 |

|                                   |    |           |           |      |    |    |     |
|-----------------------------------|----|-----------|-----------|------|----|----|-----|
| ATM_Exon_1952319                  | 11 | 108173580 | 108173756 | 177  | 1  | 0  | 100 |
| ATM_Exon_1952651                  | 11 | 108204613 | 108204695 | 83   | 1  | 0  | 100 |
| ATM_Exon_1952652                  | 11 | 108205696 | 108205836 | 141  | 1  | 0  | 100 |
| ATM_Exon_1952653                  | 11 | 108225538 | 108225601 | 64   | 1  | 2  | 100 |
| ATM_Exon_1952908 + Exon_1952908   | 11 | 108129563 | 108129952 | 390  | 2  | 2  | 100 |
| ATM_Exon_1952909                  | 11 | 108154954 | 108155200 | 247  | 1  | 4  | 100 |
| ATM_Exon_1954841                  | 11 | 108213949 | 108214098 | 150  | 1  | 0  | 100 |
| ATM_Exon_1955415                  | 11 | 108093559 | 108093913 | 355  | 2  | 2  | 100 |
| ATM_Exon_1955416                  | 11 | 108114680 | 108114845 | 166  | 1  | 0  | 100 |
| ATM_Exon_1955417                  | 11 | 108126842 | 108127100 | 259  | 1  | 0  | 100 |
| ATM_Exon_1955418                  | 11 | 108137898 | 108138069 | 172  | 1  | 0  | 100 |
| ATM_Exon_1955420                  | 11 | 108187970 | 108188340 | 371  | 2  | 4  | 100 |
| ATM_Exon_1955422                  | 11 | 108199617 | 108200128 | 512  | 2  | 0  | 100 |
| ATM_Exon_1955423                  | 11 | 108203489 | 108203627 | 139  | 1  | 0  | 100 |
| ATM_Exon_1955424                  | 11 | 108206572 | 108206688 | 117  | 1  | 0  | 100 |
| ATM_Exon_1955727                  | 11 | 108180887 | 108181042 | 156  | 1  | 2  | 100 |
| AXIN2                             | 17 | 63532413  | 63534486  | 2074 | 7  | 10 | 90  |
| AXIN2_Exon_2118232                | 17 | 63531744  | 63531839  | 96   | 1  | 0  | 100 |
| AXIN2_Exon_2118319                | 17 | 63530030  | 63530197  | 168  | 1  | 0  | 100 |
| AXIN2_Exon_2118418                | 17 | 63557568  | 63557740  | 173  | 1  | 2  | 100 |
| AXIN2_Exon_2118501                | 17 | 63545638  | 63545778  | 141  | 1  | 0  | 100 |
| AXIN2_Exon_2118654                | 17 | 63553924  | 63554854  | 931  | 4  | 0  | 100 |
| AXIN2_Exon_2118831                | 17 | 63524683  | 63526220  | 1538 | 6  | 0  | 100 |
| AXIN2_Exon_2122329                | 17 | 63537573  | 63537675  | 103  | 1  | 0  | 100 |
| BAP1                              | 3  | 52435000  | 52437935  | 2936 | 9  | 6  | 87  |
| BAP1                              | 3  | 52439101  | 52442647  | 3547 | 13 | 12 | 100 |
| BAP1                              | 3  | 52443545  | 52444034  | 490  | 2  | 0  | 100 |
| BAP1_Exon_2195407                 | 3  | 52438469  | 52438602  | 134  | 1  | 0  | 100 |
| BARD1_Exon_1852481                | 2  | 215674136 | 215674428 | 293  | 1  | 0  | 100 |
| BARD1_Exon_1852559                | 2  | 215632206 | 215632378 | 173  | 1  | 4  | 100 |
| BARD1_Exon_1852560 + Exon_1852560 | 2  | 215633806 | 215634186 | 381  | 1  | 2  | 65  |
| BARD1_Exon_1853138                | 2  | 215595135 | 215595232 | 98   | 1  | 2  | 100 |

|                                   |    |           |           |      |    |     |     |
|-----------------------------------|----|-----------|-----------|------|----|-----|-----|
| BARD1_Exon_1853139                | 2  | 215657021 | 215657169 | 149  | 1  | 0   | 100 |
| BARD1_Exon_1854769                | 2  | 215610446 | 215610578 | 133  | 1  | 0   | 100 |
| BARD1_Exon_1854892                | 2  | 215617171 | 215617279 | 109  | 1  | 0   | 100 |
| BARD1_Exon_1855753                | 2  | 215645284 | 215646233 | 950  | 4  | 4   | 100 |
| BARD1_Exon_1855754                | 2  | 215661785 | 215661841 | 57   | 1  | 0   | 100 |
| BARD1_Exon_1856283                | 2  | 215609791 | 215609883 | 93   | 1  | 0   | 100 |
| BARD1_Exon_1857115                | 2  | 215593275 | 215593732 | 458  | 2  | 10  | 100 |
| BMPR1A                            | 10 | 88683108  | 88684970  | 1863 | 7  | 4   | 100 |
| BMPR1A                            | 10 | 88659526  | 88659908  | 383  | 2  | 2   | 100 |
| BMPR1A_Exon_2246225               | 10 | 88635624  | 88635842  | 219  | 1  | 0   | 100 |
| BMPR1A_Exon_2246636               | 10 | 88678929  | 88679226  | 298  | 1  | 0   | 100 |
| BMPR1A_Exon_2246727+ Exon_2246727 | 10 | 88516134  | 88516835  | 702  | 2  | 2   | 56  |
| BMPR1A_Exon_2246728               | 10 | 88649819  | 88649981  | 163  | 1  | 2   | 100 |
| BMPR1A_Exon_2246729               | 10 | 88671997  | 88672141  | 145  | 1  | 0   | 100 |
| BMPR1A_Exon_2247064               | 10 | 88598622  | 88598736  | 115  | 1  | 0   | 100 |
| BMPR1A_Exon_2247066               | 10 | 88681277  | 88681452  | 176  | 1  | 0   | 100 |
| BMPR1A_Exon_2248431               | 10 | 88651884  | 88651986  | 103  | 1  | 0   | 100 |
| BMPR1A_Exon_2248764               | 10 | 88676891  | 88677083  | 193  | 1  | 0   | 100 |
| BRCA1                             | 17 | 41251717  | 41251972  | 256  | 1  | 0   | 100 |
| BRCA1                             | 17 | 41277174  | 41277525  | 352  | 2  | 2   | 100 |
| BRCA1                             | 17 | 41228480  | 41228656  | 177  | 1  | 0   | 100 |
| BRCA1                             | 17 | 41258448  | 41258575  | 128  | 1  | 0   | 100 |
| BRCA1                             | 17 | 41242886  | 41246952  | 4067 | 15 | 454 | 100 |
| BRCA1_Exon_1950723                | 17 | 41215891  | 41215968  | 78   | 1  | 0   | 100 |
| BRCA1_Exon_1950887                | 17 | 41219625  | 41219712  | 88   | 1  | 2   | 100 |
| BRCA1_Exon_1950888                | 17 | 41256885  | 41256973  | 89   | 1  | 6   | 100 |
| BRCA1_Exon_1951427                | 17 | 41215350  | 41215390  | 41   | 1  | 2   | 100 |
| BRCA1_Exon_1951909                | 17 | 41199660  | 41199720  | 61   | 1  | 0   | 100 |
| BRCA1_Exon_1951910+Exon_1951910   | 17 | 41247763  | 41248039  | 277  | 1  | 2   | 100 |
| BRCA1_Exon_1951911                | 17 | 41255644  | 41256409  | 766  | 2  | 22  | 76  |
| BRCA1_Exon_1952422+Exon_1952422   | 17 | 41208919  | 41209302  | 384  | 1  | 0   | 66  |
| BRCA1_Exon_1952502                | 17 | 41196262  | 41197869  | 1608 | 3  | 12  | 55  |

|                                        |    |          |          |      |    |     |     |
|----------------------------------------|----|----------|----------|------|----|-----|-----|
| BRCA1_Exon_1952503                     | 17 | 41222945 | 41223255 | 311  | 1  | 0   | 100 |
| BRCA1_Exon_1952504                     | 17 | 41234421 | 41234592 | 172  | 1  | 2   | 100 |
| BRCA1_Exon_1954922                     | 17 | 41226348 | 41226538 | 191  | 1  | 14  | 100 |
| BRCA1_Exon_1954924                     | 17 | 41267743 | 41267796 | 54   | 1  | 0   | 100 |
| BRCA1_Exon_1955584 + Exon_1955584      | 17 | 41249111 | 41249456 | 346  | 1  | 0   | 100 |
| BRCA1_Exon_1956572                     | 17 | 41276034 | 41276132 | 99   | 1  | 0   | 100 |
| BRCA1_Exon_1956968                     | 17 | 41203080 | 41203134 | 55   | 1  | 4   | 100 |
| BRCA1_Exon_2112460                     | 17 | 41201138 | 41201211 | 74   | 1  | 4   | 100 |
| BRCA1_Exon_2116381                     | 17 | 41230847 | 41231853 | 1007 | 1  | 0   | 20  |
| BRCA2                                  | 13 | 32953429 | 32954307 | 879  | 3  | 50  | 100 |
| BRCA2                                  | 13 | 32936635 | 32937695 | 1061 | 4  | 46  | 100 |
| BRCA2                                  | 13 | 32944514 | 32945262 | 749  | 2  | 26  | 66  |
| BRCA2                                  | 13 | 32900163 | 32900825 | 663  | 3  | 18  | 100 |
| BRCA2_Ex_2150341+Ex_2150340+Ex_2155357 | 13 | 32903096 | 32907574 | 4479 | 14 | 130 | 89  |
| BRCA2_Exon_2150343                     | 13 | 32968826 | 32969070 | 245  | 1  | 0   | 100 |
| BRCA2_Exon_2150518                     | 13 | 32928998 | 32929425 | 428  | 2  | 16  | 100 |
| BRCA2_Exon_2150520                     | 13 | 32950807 | 32950928 | 122  | 1  | 0   | 100 |
| BRCA2_Exon_2150521                     | 13 | 32972299 | 32973809 | 1511 | 4  | 22  | 70  |
| BRCA2_Exon_2150617                     | 13 | 32910352 | 32915383 | 5032 | 18 | 394 | 96  |
| BRCA2_Exon_2150697                     | 13 | 32899213 | 32899321 | 109  | 1  | 0   | 100 |
| BRCA2_Exon_2150699                     | 13 | 32920964 | 32921033 | 70   | 1  | 4   | 100 |
| BRCA2_Exon_2150780                     | 13 | 32889617 | 32889804 | 188  | 1  | 2   | 100 |
| BRCA2_Exon_2150781                     | 13 | 32918695 | 32918790 | 96   | 1  | 0   | 100 |
| BRCA2_Exon_2150782                     | 13 | 32931879 | 32932066 | 188  | 1  | 0   | 100 |
| BRCA2_Exon_2150953                     | 13 | 32930565 | 32930746 | 182  | 1  | 2   | 100 |
| BRCA2_Exon_2150954                     | 13 | 32971035 | 32971181 | 147  | 1  | 0   | 100 |
| BRCA2_Exon_2152552                     | 13 | 32893214 | 32893462 | 249  | 1  | 0   | 100 |
| BRCA2_Exon_2152622                     | 13 | 32890559 | 32890664 | 106  | 1  | 0   | 100 |
| BRIP1                                  | 17 | 59857360 | 59858872 | 1513 | 4  | 8   | 78  |
| BRIP1_Exon_2135398                     | 17 | 59793312 | 59793424 | 113  | 1  | 0   | 100 |
| BRIP1_Exon_2135814                     | 17 | 59756547 | 59761501 | 4955 | 13 | 8   | 74  |
| BRIP1_Exon_2135815                     | 17 | 59937157 | 59937268 | 112  | 1  | 0   | 100 |

|                                  |    |           |           |      |   |   |     |
|----------------------------------|----|-----------|-----------|------|---|---|-----|
| BRIP1_Exon_2135897               | 17 | 59924462  | 59924581  | 120  | 1 | 2 | 100 |
| BRIP1_Exon_2135986               | 17 | 59938808  | 59938930  | 123  | 1 | 0 | 100 |
| BRIP1_Exon_2136079               | 17 | 59870958  | 59871090  | 133  | 1 | 0 | 100 |
| BRIP1_Exon_2136230               | 17 | 59885728  | 59886218  | 491  | 2 | 4 | 100 |
| BRIP1_Exon_2136652               | 17 | 59821640  | 59822026  | 387  | 2 | 0 | 100 |
| BRIP1_Exon_2136653               | 17 | 59940645  | 59940920  | 276  | 1 | 4 | 100 |
| BRIP1_Exon_2137000               | 17 | 59876461  | 59876660  | 200  | 1 | 0 | 100 |
| BRIP1_Exon_2137154               | 17 | 59763197  | 59763526  | 330  | 1 | 0 | 100 |
| BRIP1_Exon_2138318               | 17 | 59770791  | 59770873  | 83   | 1 | 0 | 100 |
| BRIP1_Exon_2138319               | 17 | 59853762  | 59853923  | 162  | 1 | 0 | 100 |
| BRIP1_Exon_2138320               | 17 | 59934419  | 59934592  | 174  | 1 | 0 | 100 |
| BRIP1_Exon_2138681               | 17 | 59820374  | 59820495  | 122  | 1 | 0 | 100 |
| BRIP1_Exon_2138682               | 17 | 59926490  | 59926617  | 128  | 1 | 2 | 100 |
| BRIP1_Exon_2138836               | 17 | 59861631  | 59861785  | 155  | 1 | 0 | 100 |
| BRIP1_Exon_2138837               | 17 | 59878614  | 59878835  | 222  | 1 | 0 | 100 |
| BUB1                             | 2  | 111415962 | 111416344 | 383  | 2 | 0 | 100 |
| BUB1                             | 2  | 111425073 | 111425451 | 379  | 2 | 0 | 100 |
| BUB1                             | 2  | 111414588 | 111415247 | 660  | 3 | 2 | 100 |
| BUB1                             | 2  | 111431638 | 111431967 | 330  | 2 | 2 | 100 |
| BUB1                             | 2  | 111398586 | 111399836 | 1251 | 5 | 4 | 100 |
| BUB1_Exon_2223146                | 2  | 111427030 | 111427130 | 101  | 1 | 0 | 100 |
| BUB1_Exon_2223304                | 2  | 111413316 | 111413493 | 178  | 1 | 0 | 100 |
| BUB1_Exon_2223408                | 2  | 111397319 | 111397425 | 107  | 1 | 0 | 100 |
| BUB1_Exon_2223818                | 2  | 111406646 | 111407128 | 483  | 1 | 2 | 53  |
| BUB1_Exon_2223819                | 2  | 111430095 | 111430505 | 411  | 2 | 4 | 100 |
| BUB1_Exon_2224432                | 2  | 111395409 | 111395736 | 328  | 1 | 2 | 100 |
| BUB1_Exon_2224433                | 2  | 111408123 | 111408361 | 239  | 1 | 2 | 100 |
| BUB1_Exon_2224943                | 2  | 111428102 | 111428145 | 44   | 1 | 0 | 100 |
| BUB1_Exon_2225097                | 2  | 111435497 | 111435734 | 238  | 1 | 2 | 100 |
| BUB1_Exon_2225472 + Exon_2225472 | 2  | 111417405 | 111417763 | 359  | 2 | 0 | 100 |
| BUB1_Exon_2225473                | 2  | 111423840 | 111423991 | 152  | 1 | 0 | 100 |
| BUB1_Exon_2225818                | 2  | 111419159 | 111419418 | 260  | 1 | 0 | 100 |

|                     |    |           |           |      |   |    |     |
|---------------------|----|-----------|-----------|------|---|----|-----|
| BUB1_Exon_2225910   | 2  | 111410827 | 111411225 | 399  | 2 | 2  | 100 |
| BUB3                | 10 | 124913735 | 124914653 | 919  | 4 | 4  | 100 |
| BUB3                | 10 | 124921727 | 124922369 | 643  | 3 | 0  | 100 |
| BUB3                | 10 | 124923311 | 124924911 | 1601 | 6 | 2  | 100 |
| BUB3_Exon_2001431   | 10 | 124917245 | 124917396 | 152  | 1 | 0  | 100 |
| BUB3_Exon_2001432   | 10 | 124919923 | 124920081 | 159  | 1 | 0  | 100 |
| BUB3_Exon_2003522   | 10 | 124915174 | 124915243 | 70   | 1 | 2  | 100 |
| CDH1                | 16 | 68842302  | 68842776  | 475  | 2 | 4  | 100 |
| CDH1                | 16 | 68845562  | 68846191  | 630  | 3 | 8  | 100 |
| CDH1_Exon_1869260   | 16 | 68844100  | 68844244  | 145  | 1 | 0  | 100 |
| CDH1_Exon_1869337   | 16 | 68835573  | 68835796  | 224  | 1 | 0  | 100 |
| CDH1_Exon_1869454   | 16 | 68847216  | 68847398  | 183  | 1 | 0  | 100 |
| CDH1_Exon_1869455   | 16 | 68857302  | 68857529  | 228  | 1 | 0  | 100 |
| CDH1_Exon_1869695   | 16 | 68855904  | 68856128  | 225  | 1 | 4  | 100 |
| CDH1_Exon_1870347   | 16 | 68867193  | 68869444  | 2252 | 7 | 10 | 90  |
| CDH1_Exon_1870537   | 16 | 68771195  | 68771366  | 172  | 1 | 0  | 100 |
| CDH1_Exon_1872690   | 16 | 68772200  | 68772314  | 115  | 1 | 0  | 100 |
| CDH1_Exon_1872691   | 16 | 68849418  | 68849662  | 245  | 1 | 0  | 100 |
| CDH1_Exon_1872692   | 16 | 68862077  | 68862207  | 131  | 1 | 0  | 100 |
| CDH1_Exon_1873486   | 16 | 68863507  | 68863750  | 244  | 1 | 0  | 100 |
| CDH1_Exon_1874308   | 16 | 68853183  | 68853328  | 146  | 1 | 4  | 100 |
| CDKN2A              | 9  | 21974378  | 21975157  | 780  | 3 | 4  | 100 |
| CDKN2A              | 9  | 21967726  | 21968795  | 1070 | 4 | 6  | 100 |
| CDKN2A_Exon_1891068 | 9  | 21970901  | 21971207  | 307  | 1 | 0  | 100 |
| CDKN2A_Exon_2259042 | 9  | 21994138  | 21994490  | 353  | 1 | 0  | 100 |
| CDX2_Exon_2218652   | 13 | 28536278  | 28537506  | 1229 | 5 | 6  | 100 |
| CDX2_Exon_2219743   | 13 | 28542603  | 28543317  | 715  | 3 | 2  | 100 |
| CDX2_Exon_2220188   | 13 | 28539007  | 28539152  | 146  | 1 | 0  | 100 |
| CHEK1               | 11 | 125499102 | 125499380 | 279  | 1 | 2  | 100 |
| CHEK1               | 11 | 125525095 | 125525665 | 571  | 2 | 0  | 100 |
| CHEK1               | 11 | 125513662 | 125514563 | 902  | 2 | 0  | 77  |
| CHEK1               | 11 | 125495011 | 125496753 | 1743 | 7 | 10 | 100 |

|                                   |    |           |           |      |   |    |     |
|-----------------------------------|----|-----------|-----------|------|---|----|-----|
| CHEK1_Exon_2008398                | 11 | 125523541 | 125523842 | 302  | 1 | 0  | 100 |
| CHEK1_Exon_2010334                | 11 | 125504725 | 125505559 | 835  | 3 | 4  | 100 |
| CHEK1_Exon_2010493                | 11 | 125503058 | 125503246 | 189  | 1 | 0  | 100 |
| CHEK1_Exon_2010584                | 11 | 125497502 | 125497725 | 224  | 1 | 2  | 100 |
| CHEK1_Exon_2011355                | 11 | 125507344 | 125507439 | 96   | 1 | 0  | 100 |
| CHEK1_Exon_2190773                | 11 | 125545117 | 125546895 | 1779 | 5 | 6  | 73  |
| CHEK2                             | 22 | 29120840  | 29121480  | 641  | 1 | 2  | 54  |
| CHEK2                             | 22 | 29091090  | 29091886  | 797  | 2 | 4  | 67  |
| CHEK2_Exon_1951634                | 22 | 29130391  | 29130715  | 325  | 1 | 0  | 100 |
| CHEK2_Exon_1952800                | 22 | 29083681  | 29084024  | 344  | 1 | 2  | 100 |
| CHEK2_Exon_1952803                | 22 | 29137757  | 29137822  | 66   | 1 | 0  | 100 |
| CHEK2_Exon_1953091                | 22 | 29085123  | 29085203  | 81   | 1 | 0  | 100 |
| CHEK2_Exon_1953092                | 22 | 29099493  | 29099554  | 62   | 1 | 0  | 100 |
| CHEK2_Exon_1953597                | 22 | 29090020  | 29090105  | 86   | 1 | 2  | 100 |
| CHEK2_Exon_1953598                | 22 | 29115383  | 29115473  | 91   | 1 | 0  | 100 |
| CHEK2_Exon_1953909                | 22 | 29105994  | 29106047  | 54   | 1 | 0  | 100 |
| CHEK2_Exon_1953993                | 22 | 29107897  | 29108005  | 109  | 1 | 0  | 100 |
| CHEK2_Exon_1954256                | 22 | 29095826  | 29095925  | 100  | 1 | 0  | 100 |
| CHEK2_Exon_1956164                | 22 | 29092889  | 29092975  | 87   | 1 | 4  | 100 |
| CHEK2_Exon_2007208 + Exon_2007208 | 22 | 29126145  | 29126564  | 420  | 0 | 0  | 0   |
| CTNNB1                            | 3  | 41265487  | 41267377  | 1891 | 7 | 94 | 100 |
| CTNNB1                            | 3  | 41274807  | 41275813  | 1007 | 4 | 4  | 100 |
| CTNNB1                            | 3  | 41280600  | 41281964  | 1365 | 5 | 14 | 100 |
| CTNNB1                            | 3  | 41277815  | 41278225  | 411  | 2 | 90 | 100 |
| CTNNB1_Exon_2004993               | 3  | 41240942  | 41241161  | 220  | 1 | 0  | 100 |
| CTNNB1_Exon_2006997               | 3  | 41277215  | 41277334  | 120  | 1 | 0  | 100 |
| CTNNB1_Exon_2007100               | 3  | 41279507  | 41279567  | 61   | 1 | 2  | 100 |
| CTNNB1_Exon_2007236               | 3  | 41268699  | 41268843  | 145  | 1 | 0  | 100 |
| DVL2                              | 17 | 7128636   | 7131388   | 2753 | 9 | 8  | 92  |
| DVL2                              | 17 | 7132263   | 7134141   | 1879 | 6 | 0  | 90  |
| DVL2_Exon_2056452                 | 17 | 7137388   | 7137863   | 476  | 2 | 0  | 100 |
| EPCAM                             | 2  | 47600577  | 47601212  | 636  | 3 | 4  | 100 |



|                                         |    |           |           |      |   |    |     |
|-----------------------------------------|----|-----------|-----------|------|---|----|-----|
| EPCAM_Exon_1879191                      | 2  | 47606858  | 47607158  | 301  | 1 | 2  | 100 |
| EPCAM_Exon_1879192                      | 2  | 47612305  | 47612349  | 45   | 1 | 0  | 100 |
| EPCAM_Exon_1879334                      | 2  | 47596287  | 47596720  | 434  | 2 | 0  | 100 |
| EPCAM_Exon_1879450 + Exon_1879450       | 2  | 47604053  | 47604316  | 264  | 1 | 0  | 100 |
| EPCAM_Exon_1879775                      | 2  | 47606092  | 47606193  | 102  | 1 | 0  | 100 |
| EPCAM_Exon_1882750                      | 2  | 47613661  | 47614217  | 557  | 1 | 2  | 50  |
| EPCAM_Exon_1884776                      | 2  | 47602373  | 47602438  | 66   | 1 | 2  | 100 |
| FAM175A_E_2122351+_E_2122352+_E_2122353 | 4  | 84388607  | 84391549  | 2943 | 7 | 0  | 69  |
| FAM175A_Ex_2120375+_2123427++FAM175A_E  | 4  | 84382094  | 84384911  | 2818 | 8 | 8  | 84  |
| FAM175A_Exon_2120536                    | 4  | 84397796  | 84397832  | 37   | 1 | 0  | 100 |
| FAM175A_Exon_2120640                    | 4  | 84403307  | 84403397  | 91   | 1 | 2  | 100 |
| FAM175A_Exon_2122137                    | 4  | 84406139  | 84406290  | 152  | 1 | 0  | 100 |
| FAM175A_Exon_2122991                    | 4  | 84393375  | 84393441  | 67   | 1 | 0  | 100 |
| FAM175B_Exon_2061711+ Exon_2061711      | 10 | 126494938 | 126496679 | 1742 | 2 | 0  | 40  |
| FAM175B_Exon_2061712                    | 10 | 126505145 | 126505181 | 37   | 1 | 0  | 100 |
| FAM175B_Exon_2061713                    | 10 | 126519918 | 126520032 | 115  | 1 | 0  | 100 |
| FAM175B_Exon_2062054                    | 10 | 126517325 | 126517444 | 120  | 1 | 0  | 100 |
| FAM175B_Exon_2062139                    | 10 | 126523071 | 126525239 | 2169 | 8 | 12 | 100 |
| FAM175B_Exon_2062220                    | 10 | 126490354 | 126490470 | 117  | 1 | 0  | 100 |
| FAM175B_Exon_2063807                    | 10 | 126507856 | 126508212 | 357  | 2 | 0  | 100 |
| FAM175B_Exon_2063994                    | 10 | 126515064 | 126515454 | 391  | 2 | 2  | 100 |
| FAM175B_Exon_2063995                    | 10 | 126517962 | 126518046 | 85   | 1 | 0  | 100 |
| FGFR2                                   | 10 | 123237819 | 123239560 | 1742 | 7 | 10 | 100 |
| FGFR2                                   | 10 | 123353198 | 123353797 | 600  | 3 | 2  | 100 |
| FGFR2                                   | 10 | 123274606 | 123274858 | 253  | 1 | 0  | 100 |
| FGFR2 + Exon_1894461 + Exon_1894461     | 10 | 123246843 | 123247727 | 885  | 3 | 24 | 91  |
| FGFR2_Exon_1893695                      | 10 | 123298106 | 123298229 | 124  | 1 | 2  | 100 |
| FGFR2_Exon_1893779                      | 10 | 123357476 | 123357972 | 497  | 2 | 2  | 100 |
| FGFR2_Exon_1894102                      | 10 | 123244909 | 123245046 | 138  | 1 | 0  | 100 |
| FGFR2_Exon_1894445                      | 10 | 123258009 | 123258119 | 111  | 1 | 2  | 100 |
| FGFR2_Exon_1894462                      | 10 | 123279493 | 123279683 | 191  | 1 | 0  | 100 |
| FGFR2_Exon_1895058                      | 10 | 123241367 | 123241691 | 325  | 1 | 6  | 100 |

|                                   |    |           |           |      |   |     |     |
|-----------------------------------|----|-----------|-----------|------|---|-----|-----|
| FGFR2_Exon_1895059                | 10 | 123263304 | 123263455 | 152  | 1 | 0   | 100 |
| FGFR2_Exon_1895224                | 10 | 123243212 | 123243317 | 106  | 1 | 0   | 100 |
| FGFR2_Exon_1895225 + Exon_1895225 | 10 | 123310254 | 123311223 | 970  | 3 | 8   | 79  |
| FGFR2_Exon_1896050                | 10 | 123324016 | 123324093 | 78   | 1 | 2   | 100 |
| FGFR2_Exon_1896126                | 10 | 123260340 | 123260461 | 122  | 1 | 2   | 100 |
| FGFR2_Exon_1896127                | 10 | 123278196 | 123278343 | 148  | 1 | 0   | 100 |
| FGFR2_Exon_1896380                | 10 | 123256046 | 123256236 | 191  | 1 | 0   | 100 |
| FGFR2_Exon_2008715                | 10 | 123276833 | 123276977 | 145  | 1 | 0   | 100 |
| FGFR2_Exon_2141967                | 10 | 123324952 | 123325218 | 267  | 1 | 0   | 100 |
| FGFR2_Exon_2284748                | 10 | 123355991 | 123356159 | 169  | 1 | 2   | 100 |
| MAP3K1                            | 5  | 56160486  | 56161879  | 1394 | 3 | 0   | 70  |
| MAP3K1                            | 5  | 56168443  | 56168857  | 415  | 2 | 2   | 100 |
| MAP3K1                            | 5  | 56176513  | 56178718  | 2206 | 8 | 38  | 97  |
| MAP3K1_Exon_2290037               | 5  | 56181759  | 56181890  | 132  | 1 | 0   | 100 |
| MAP3K1_Exon_2290118               | 5  | 56110900  | 56111882  | 983  | 3 | 2   | 71  |
| MAP3K1_Exon_2290119               | 5  | 56189358  | 56191978  | 2621 | 9 | 4   | 100 |
| MAP3K1_Exon_2290279               | 5  | 56167737  | 56167858  | 122  | 1 | 0   | 100 |
| MAP3K1_Exon_2290282               | 5  | 56184053  | 56184184  | 132  | 1 | 0   | 100 |
| MAP3K1_Exon_2290825               | 5  | 56152427  | 56152577  | 151  | 1 | 2   | 100 |
| MAP3K1_Exon_2290826               | 5  | 56170859  | 56171137  | 279  | 1 | 2   | 100 |
| MAP3K1_Exon_2291452               | 5  | 56174807  | 56174928  | 122  | 1 | 0   | 100 |
| MAP3K1_Exon_2291454               | 5  | 56179354  | 56179506  | 153  | 1 | 0   | 100 |
| MAP3K1_Exon_2291976               | 5  | 56180491  | 56180653  | 163  | 1 | 0   | 100 |
| MAP3K1_Exon_2292354               | 5  | 56155542  | 56155742  | 201  | 1 | 0   | 100 |
| MAP3K1_Exon_2292355               | 5  | 56183205  | 56183347  | 143  | 1 | 0   | 100 |
| MLH1                              | 3  | 37053286  | 37053615  | 330  | 1 | 0   | 100 |
| MLH1                              | 3  | 37034816  | 37035406  | 591  | 3 | 6   | 100 |
| MLH1                              | 3  | 37042421  | 37042569  | 149  | 1 | 0   | 100 |
| MLH1                              | 3  | 37038049  | 37038260  | 212  | 1 | 0   | 100 |
| MLH1                              | 3  | 37089933  | 37090583  | 651  | 3 | 214 | 100 |
| MLH1_Exon_1914206                 | 3  | 37067128  | 37067498  | 371  | 2 | 18  | 100 |
| MLH1_Exon_1914285                 | 3  | 37058997  | 37059090  | 94   | 1 | 0   | 100 |

|                                 |    |          |          |      |    |     |     |
|---------------------------------|----|----------|----------|------|----|-----|-----|
| MLH1_Exon_1914378               | 3  | 37045892 | 37045965 | 74   | 1  | 0   | 100 |
| MLH1_Exon_1914379               | 3  | 37055923 | 37056035 | 113  | 1  | 0   | 100 |
| MLH1_Exon_1914530               | 3  | 37048482 | 37048554 | 73   | 1  | 2   | 100 |
| MLH1_Exon_1914610               | 3  | 37061801 | 37061954 | 154  | 1  | 4   | 100 |
| MLH1_Exon_1915098               | 3  | 37083700 | 37083900 | 201  | 1  | 0   | 100 |
| MLH1_Exon_1915412               | 3  | 37091927 | 37092387 | 461  | 2  | 54  | 100 |
| MLH1_Exon_1916639               | 3  | 37070275 | 37070423 | 149  | 1  | 0   | 100 |
| MLH1_Exon_1917495               | 3  | 37081677 | 37081785 | 109  | 1  | 4   | 100 |
| MLH1_Exon_1917611+ Exon_1917611 | 3  | 37088910 | 37089274 | 365  | 2  | 118 | 100 |
| MLH1_Exon_2038480               | 3  | 37050305 | 37050396 | 92   | 1  | 2   | 100 |
| MRE11A                          | 11 | 94226825 | 94227065 | 241  | 1  | 4   | 100 |
| MRE11A_Exon_2236473             | 11 | 94170343 | 94170401 | 59   | 1  | 2   | 100 |
| MRE11A_Exon_2236474             | 11 | 94194102 | 94194202 | 101  | 1  | 0   | 100 |
| MRE11A_Exon_2236475             | 11 | 94204740 | 94204925 | 186  | 1  | 0   | 100 |
| MRE11A_Exon_2236553             | 11 | 94180385 | 94180604 | 220  | 1  | 0   | 100 |
| MRE11A_Exon_2236637             | 11 | 94192574 | 94192747 | 174  | 1  | 0   | 100 |
| MRE11A_Exon_2236638             | 11 | 94219090 | 94219250 | 161  | 1  | 0   | 100 |
| MRE11A_Exon_2236821             | 11 | 94189442 | 94189504 | 63   | 1  | 2   | 100 |
| MRE11A_Exon_2236822             | 11 | 94197279 | 94197405 | 127  | 1  | 2   | 100 |
| MRE11A_Exon_2236823             | 11 | 94223999 | 94224131 | 133  | 1  | 0   | 100 |
| MRE11A_Exon_2237151             | 11 | 94163077 | 94163152 | 76   | 1  | 0   | 100 |
| MRE11A_Exon_2237152             | 11 | 94200979 | 94201059 | 81   | 1  | 0   | 100 |
| MRE11A_Exon_2237153             | 11 | 94212840 | 94212927 | 88   | 1  | 2   | 100 |
| MRE11A_Exon_2237222             | 11 | 94150469 | 94153347 | 2879 | 10 | 6   | 93  |
| MRE11A_Exon_2238755             | 11 | 94168998 | 94169065 | 68   | 1  | 4   | 100 |
| MRE11A_Exon_2238756             | 11 | 94211901 | 94212042 | 142  | 1  | 2   | 100 |
| MRE11A_Exon_2238915             | 11 | 94225948 | 94226072 | 125  | 1  | 2   | 100 |
| MRE11A_Exon_2238997             | 11 | 94209405 | 94209619 | 215  | 1  | 2   | 100 |
| MRE11A_Exon_2239321             | 11 | 94203637 | 94203808 | 172  | 1  | 0   | 100 |
| MRE11A_Exon_2277593             | 11 | 94178850 | 94179200 | 351  | 1  | 2   | 100 |
| MSH2_Exon_1988795               | 2  | 47690170 | 47690293 | 124  | 1  | 2   | 100 |
| MSH2_Exon_1989651               | 2  | 47672687 | 47672796 | 110  | 1  | 0   | 100 |

|                                  |   |          |          |      |    |     |     |
|----------------------------------|---|----------|----------|------|----|-----|-----|
| MSH2_Exon_1990005                | 2 | 47703506 | 47703710 | 205  | 1  | 4   | 100 |
| MSH2_Exon_1990006                | 2 | 47705411 | 47705658 | 248  | 1  | 0   | 100 |
| MSH2_Exon_1990172                | 2 | 47637233 | 47637511 | 279  | 1  | 2   | 100 |
| MSH2_Exon_1990173                | 2 | 47698054 | 47698251 | 198  | 1  | 56  | 100 |
| MSH2_Exon_1990613                | 2 | 47641408 | 47641557 | 150  | 1  | 10  | 100 |
| MSH2_Exon_1990614                | 2 | 47693747 | 47693997 | 251  | 1  | 54  | 100 |
| MSH2_Exon_1991019                | 2 | 47639503 | 47639749 | 247  | 1  | 0   | 100 |
| MSH2_Exon_1991020                | 2 | 47709918 | 47710360 | 443  | 2  | 2   | 100 |
| MSH2_Exon_1991849                | 2 | 47635490 | 47635855 | 366  | 2  | 2   | 100 |
| MSH2_Exon_1992093                | 2 | 47702164 | 47702409 | 246  | 1  | 0   | 100 |
| MSH2_Exon_1992094                | 2 | 47707835 | 47708010 | 176  | 1  | 0   | 100 |
| MSH2_Exon_1993122                | 2 | 47630263 | 47630541 | 279  | 1  | 2   | 100 |
| MSH2_Exon_1993123                | 2 | 47643435 | 47643568 | 134  | 1  | 0   | 100 |
| MSH2_Exon_1993124                | 2 | 47656881 | 47657080 | 200  | 1  | 6   | 100 |
| MSH6                             | 2 | 48032732 | 48034117 | 1386 | 5  | 192 | 100 |
| MSH6_Exon_2112304                | 2 | 48022983 | 48023252 | 270  | 1  | 2   | 100 |
| MSH6_Exon_2112942                | 2 | 48018066 | 48018262 | 197  | 1  | 4   | 100 |
| MSH6_Exon_2113179                | 2 | 48030559 | 48030824 | 266  | 1  | 2   | 100 |
| MSH6_Exon_2114169                | 2 | 48010171 | 48010682 | 512  | 2  | 6   | 100 |
| MSH6_Exon_2115373                | 2 | 48025700 | 48028344 | 2645 | 10 | 72  | 100 |
| MSH6_Exon_2116506 + Exon_2116506 | 2 | 48031949 | 48032266 | 318  | 1  | 6   | 100 |
| MUTYH                            | 1 | 45805546 | 45806167 | 622  | 3  | 6   | 100 |
| MUTYH                            | 1 | 45796829 | 45799300 | 2472 | 7  | 2   | 82  |
| MUTYH_Exon_1834267+ Exon_1832588 | 1 | 45794426 | 45796339 | 1914 | 3  | 0   | 46  |
| MUTYH_Exon_1834268               | 1 | 45800063 | 45800183 | 121  | 1  | 2   | 100 |
| NBN                              | 8 | 90992937 | 90993776 | 840  | 3  | 2   | 100 |
| NBN_Exon_2131142                 | 8 | 90994950 | 90995083 | 134  | 1  | 0   | 100 |
| NBN_Exon_2132260                 | 8 | 90949254 | 90949303 | 50   | 1  | 0   | 100 |
| NBN_Exon_2132261                 | 8 | 90958368 | 90958523 | 156  | 1  | 2   | 100 |
| NBN_Exon_2132262                 | 8 | 90990448 | 90990551 | 104  | 1  | 0   | 100 |
| NBN_Exon_2132382                 | 8 | 90955481 | 90955594 | 114  | 1  | 0   | 100 |
| NBN_Exon_2132383                 | 8 | 90965472 | 90965919 | 448  | 2  | 0   | 100 |

|                                   |    |          |          |      |   |    |     |
|-----------------------------------|----|----------|----------|------|---|----|-----|
| NBN_Exon_2132384                  | 8  | 90983401 | 90983518 | 118  | 1 | 0  | 100 |
| NBN_Exon_2132523                  | 8  | 90976638 | 90976735 | 98   | 1 | 0  | 100 |
| NBN_Exon_2132524                  | 8  | 90982592 | 90982785 | 194  | 1 | 4  | 100 |
| NBN_Exon_2132554                  | 8  | 90967511 | 90967783 | 273  | 1 | 4  | 100 |
| NBN_Exon_2133030                  | 8  | 90960052 | 90960120 | 69   | 1 | 4  | 100 |
| NBN_Exon_2133083                  | 8  | 90996703 | 90996949 | 247  | 1 | 54 | 100 |
| NBN_Exon_2133408                  | 8  | 90945564 | 90947840 | 2277 | 9 | 16 | 100 |
| NBN_Exon_2133850                  | 8  | 90970953 | 90971082 | 130  | 1 | 4  | 100 |
| NOTCH3                            | 19 | 15295081 | 15296515 | 1435 | 4 | 2  | 66  |
| NOTCH3                            | 19 | 15302210 | 15303355 | 1146 | 2 | 0  | 59  |
| NOTCH3                            | 19 | 15299775 | 15300264 | 490  | 1 | 2  | 55  |
| NOTCH3                            | 19 | 15276154 | 15276927 | 774  | 2 | 2  | 76  |
| NOTCH3                            | 19 | 15297664 | 15298174 | 511  | 2 | 6  | 100 |
| NOTCH3                            | 19 | 15298667 | 15299184 | 518  | 2 | 2  | 100 |
| NOTCH3                            | 19 | 15280872 | 15281661 | 790  | 3 | 2  | 100 |
| NOTCH3_Exon_2068972               | 19 | 15273176 | 15273473 | 298  | 1 | 0  | 100 |
| NOTCH3_Exon_2069479               | 19 | 15278010 | 15278272 | 263  | 1 | 0  | 100 |
| NOTCH3_Exon_2070761               | 19 | 15270444 | 15272525 | 2082 | 8 | 8  | 100 |
| NOTCH3_Exon_2070762               | 19 | 15288336 | 15288901 | 566  | 2 | 0  | 100 |
| NOTCH3_Exon_2070928               | 19 | 15284879 | 15285211 | 333  | 1 | 4  | 100 |
| NOTCH3_Exon_2073214               | 19 | 15311599 | 15311792 | 194  | 1 | 0  | 100 |
| NOTCH3_Exon_2073517               | 19 | 15308311 | 15308389 | 79   | 1 | 0  | 100 |
| NOTCH3                            | 19 | 15289509 | 15292637 | 3129 | 8 | 2  | 71  |
| PALB2                             | 16 | 23649146 | 23649475 | 330  | 1 | 0  | 100 |
| PALB2                             | 16 | 23640500 | 23641815 | 1316 | 5 | 0  | 100 |
| PALB2_Exon_2281839 + Exon_2281839 | 16 | 23634190 | 23634551 | 362  | 1 | 0  | 72  |
| PALB2_Exon_2281999                | 16 | 23625325 | 23625412 | 88   | 1 | 0  | 100 |
| PALB2_Exon_2282000                | 16 | 23635330 | 23635415 | 86   | 1 | 0  | 100 |
| PALB2_Exon_2282424                | 16 | 23646183 | 23647655 | 1473 | 6 | 10 | 100 |
| PALB2_Exon_2282606                | 16 | 23652431 | 23652678 | 248  | 1 | 0  | 100 |
| PALB2_Exon_2282953                | 16 | 23614483 | 23614990 | 508  | 2 | 2  | 100 |
| PALB2_Exon_2282954                | 16 | 23619185 | 23619333 | 149  | 1 | 0  | 100 |

|                                  |    |           |           |      |   |    |     |
|----------------------------------|----|-----------|-----------|------|---|----|-----|
| PALB2_Exon_2282955               | 16 | 23632683  | 23632799  | 117  | 1 | 0  | 100 |
| PALB2_Exon_2282956               | 16 | 23637557  | 23637718  | 162  | 1 | 0  | 100 |
| PMS2                             | 7  | 6043296   | 6043714   | 419  | 2 | 2  | 100 |
| PMS2                             | 7  | 6045498   | 6045687   | 190  | 1 | 8  | 100 |
| PMS2_Exon_1914600                | 7  | 6026390   | 6027251   | 862  | 2 | 14 | 77  |
| PMS2_Exon_1915021                | 7  | 603127    | 603794    | 668  | 3 | 0  | 100 |
| PMS2_Exon_1915022                | 7  | 6038739   | 6038906   | 168  | 1 | 2  | 100 |
| PMS2_Exon_1915512                | 7  | 6035165   | 6035264   | 100  | 1 | 2  | 100 |
| PMS2_Exon_1915655                | 7  | 6048628   | 6048737   | 110  | 1 | 2  | 100 |
| PMS2_Exon_1915939                | 7  | 6012870   | 6013173   | 304  | 1 | 0  | 100 |
| PMS2_Exon_1916560 + Exon_1916560 | 7  | 6022284   | 6022719   | 436  | 0 | 0  | 0   |
| PMS2_Exon_1916715                | 7  | 6036907   | 6037104   | 198  | 1 | 0  | 100 |
| PMS2_Exon_1917092                | 7  | 6042084   | 6042267   | 184  | 1 | 2  | 100 |
| PMS2_Exon_1917948 + Exon_1917948 | 7  | 6029281   | 6029736   | 456  | 2 | 2  | 100 |
| POLD1                            | 19 | 50905010  | 50906879  | 1870 | 5 | 12 | 78  |
| POLD1                            | 19 | 50909414  | 50910697  | 1284 | 3 | 2  | 63  |
| POLD1                            | 19 | 50902083  | 50902766  | 684  | 2 | 0  | 74  |
| POLD1                            | 19 | 50916658  | 50917161  | 504  | 2 | 4  | 100 |
| POLD1                            | 19 | 50912017  | 50912948  | 932  | 4 | 4  | 100 |
| POLD1                            | 19 | 50918047  | 50919108  | 1062 | 4 | 2  | 100 |
| POLD1                            | 19 | 50919628  | 50920551  | 924  | 3 | 6  | 88  |
| POLD1_Exon_2136589               | 19 | 50887593  | 50887647  | 55   | 1 | 0  | 100 |
| POLD1_Exon_2136948               | 19 | 50921049  | 50921321  | 273  | 1 | 0  | 100 |
| POLE                             | 12 | 133218208 | 133220588 | 2381 | 9 | 8  | 100 |
| POLE                             | 12 | 133202206 | 133202928 | 723  | 3 | 6  | 100 |
| POLE                             | 12 | 133237530 | 133238295 | 766  | 3 | 4  | 100 |
| POLE                             | 12 | 133200323 | 133201605 | 1283 | 5 | 8  | 100 |
| POLE                             | 12 | 133253924 | 133254330 | 407  | 1 | 0  | 60  |
| POLE                             | 12 | 133208876 | 133209406 | 531  | 2 | 0  | 100 |
| POLE                             | 12 | 133256058 | 133257890 | 1833 | 6 | 2  | 88  |
| POLE                             | 12 | 133251959 | 133253264 | 1306 | 5 | 2  | 100 |
| POLE                             | 12 | 133225490 | 133226500 | 1011 | 3 | 4  | 80  |

|                                   |    |           |           |      |    |    |     |
|-----------------------------------|----|-----------|-----------|------|----|----|-----|
| POLE                              | 12 | 133233697 | 133234581 | 885  | 4  | 2  | 100 |
| POLE                              | 12 | 133244917 | 133245550 | 634  | 2  | 0  | 85  |
| POLE                              | 12 | 133248776 | 133250318 | 1543 | 6  | 8  | 100 |
| POLE                              | 12 | 133240515 | 133241123 | 609  | 3  | 4  | 100 |
| POLE_Exon_1935810                 | 12 | 133235881 | 133236095 | 215  | 1  | 4  | 100 |
| POLE_Exon_1935813                 | 12 | 133263840 | 133263945 | 106  | 1  | 0  | 100 |
| POLE_Exon_1936221                 | 12 | 133241888 | 133242036 | 149  | 1  | 2  | 100 |
| POLE_Exon_1936222                 | 12 | 133244039 | 133244284 | 246  | 1  | 0  | 100 |
| POLE_Exon_1938399                 | 12 | 133214600 | 133214725 | 126  | 1  | 0  | 100 |
| POLE_Exon_1938654                 | 12 | 133212478 | 133212610 | 133  | 1  | 2  | 100 |
| POLE_Exon_1939374                 | 12 | 133210772 | 133210964 | 193  | 1  | 2  | 100 |
| POLE_Exon_1942079                 | 12 | 133215711 | 133215884 | 174  | 1  | 0  | 100 |
| PSMC3IP                           | 17 | 40724304  | 40726253  | 1950 | 7  | 4  | 100 |
| PSMC3IP                           | 17 | 40729206  | 40729772  | 567  | 2  | 0  | 100 |
| PTEN_Exon_1918508                 | 10 | 89690803  | 89690846  | 44   | 1  | 0  | 100 |
| PTEN_Exon_1918682                 | 10 | 89685270  | 89685314  | 45   | 1  | 4  | 100 |
| PTEN_Exon_1918683                 | 10 | 89692770  | 89693008  | 239  | 1  | 0  | 100 |
| PTEN_Exon_1919112                 | 10 | 89720651  | 89720875  | 225  | 1  | 0  | 100 |
| PTEN_Exon_1919190                 | 10 | 89717610  | 89717776  | 167  | 1  | 0  | 100 |
| PTEN_Exon_1919260                 | 10 | 89711875  | 89712016  | 142  | 1  | 0  | 100 |
| PTEN_Exon_1920862                 | 10 | 89653782  | 89653866  | 85   | 1  | 0  | 100 |
| PTEN_Exon_1921036                 | 10 | 89725044  | 89728532  | 3489 | 13 | 24 | 100 |
| PTEN_Exon_1921622                 | 10 | 89623145  | 89624355  | 1211 | 5  | 4  | 100 |
| RAD51C                            | 17 | 56772267  | 56772720  | 454  | 2  | 0  | 100 |
| RAD51C_Exon_2069743               | 17 | 56769963  | 56770149  | 187  | 1  | 0  | 100 |
| RAD51C_Exon_2140538+ Exon_2140538 | 17 | 56795782  | 56800686  | 4905 | 10 | 4  | 59  |
| RAD51C_Exon_2140807               | 17 | 56801401  | 56801461  | 61   | 1  | 2  | 100 |
| RAD51C_Exon_2141215               | 17 | 56787220  | 56787351  | 132  | 1  | 0  | 100 |
| RAD51C_Exon_2141298               | 17 | 56780557  | 56780690  | 134  | 1  | 0  | 100 |
| RAD51C_Exon_2143632               | 17 | 56811479  | 56811692  | 214  | 1  | 0  | 100 |
| RAD51C_Exon_2144159               | 17 | 56774054  | 56774220  | 167  | 1  | 0  | 100 |
| RAD51C_Exon_2144440               | 17 | 56809845  | 56809905  | 61   | 1  | 0  | 100 |

|                                     |    |          |          |      |    |    |     |
|-------------------------------------|----|----------|----------|------|----|----|-----|
| RAD51L1_Exon_1842988 + Exon_1842988 | 14 | 68292081 | 68292394 | 314  | 1  | 0  | 100 |
| RAD51L1_Exon_1842989                | 14 | 68878141 | 68878244 | 104  | 1  | 0  | 100 |
| RAD51L1_Exon_1843075                | 14 | 68331720 | 68331856 | 137  | 1  | 2  | 100 |
| RAD51L1_Exon_1843076                | 14 | 68352586 | 68352705 | 120  | 1  | 4  | 100 |
| RAD51L1_Exon_1844046                | 14 | 68301797 | 68301913 | 117  | 1  | 0  | 100 |
| RAD51L1_Exon_1845610                | 14 | 68286496 | 68286570 | 75   | 1  | 0  | 100 |
| RAD51L1_Exon_1845611                | 14 | 68290259 | 68290344 | 86   | 1  | 0  | 100 |
| RAD51L1_Exon_1845612                | 14 | 68353738 | 68353921 | 184  | 1  | 0  | 100 |
| RAD51L1_Exon_1845613                | 14 | 68758601 | 68758697 | 97   | 1  | 2  | 100 |
| RAD51L1_Exon_1845858                | 14 | 68934889 | 68934967 | 79   | 1  | 2  | 100 |
| RAD51L1_Exon_1849196                | 14 | 68963841 | 68964598 | 758  | 3  | 2  | 100 |
| RAD51L1_Exon_1943519                | 14 | 69061202 | 69062738 | 1537 | 5  | 4  | 86  |
| RAD51L1_Exon_1946690                | 14 | 68944365 | 68944810 | 446  | 2  | 4  | 100 |
| RAD51L3                             | 17 | 33426786 | 33428409 | 1624 | 6  | 22 | 100 |
| RAD51L3                             | 17 | 33430248 | 33430588 | 341  | 1  | 2  | 100 |
| RAD51L3                             | 17 | 33433982 | 33434491 | 510  | 2  | 0  | 100 |
| RAD51L3                             | 17 | 33445495 | 33446913 | 1419 | 4  | 0  | 67  |
| RAD51L3_Exon_1939576                | 17 | 33433405 | 33433500 | 96   | 1  | 0  | 100 |
| RAD51L3_Exon_1988666                | 17 | 33443878 | 33444056 | 179  | 1  | 0  | 100 |
| SMAD4                               | 18 | 48584470 | 48584851 | 382  | 2  | 2  | 100 |
| SMAD4                               | 18 | 48575031 | 48575719 | 689  | 3  | 2  | 100 |
| SMAD4_Exon_1928588                  | 18 | 48573290 | 48573665 | 376  | 2  | 2  | 100 |
| SMAD4_Exon_1928589                  | 18 | 48593389 | 48593557 | 169  | 1  | 0  | 100 |
| SMAD4_Exon_1928738                  | 18 | 48586236 | 48586286 | 51   | 1  | 4  | 100 |
| SMAD4_Exon_1928739                  | 18 | 48604626 | 48611411 | 6786 | 22 | 6  | 89  |
| SMAD4_Exon_1928910                  | 18 | 48581101 | 48581413 | 313  | 2  | 0  | 100 |
| SMAD4_Exon_1928911                  | 18 | 48603008 | 48603146 | 139  | 1  | 2  | 100 |
| SMAD4_Exon_1929403                  | 18 | 48591793 | 48591976 | 184  | 1  | 2  | 100 |
| SMAD4_Exon_1929587                  | 18 | 48556583 | 48556993 | 411  | 2  | 0  | 100 |
| STK11                               | 19 | 1220347  | 1221364  | 1018 | 4  | 4  | 100 |
| STK11_Exon_2002265                  | 19 | 1227592  | 1228434  | 843  | 3  | 2  | 100 |
| STK11_exon_2002659                  | 19 | 1218366  | 1218549  | 184  | 1  | 54 | 100 |



|                                   |    |           |           |      |   |     |     |
|-----------------------------------|----|-----------|-----------|------|---|-----|-----|
| STK11_Exon_2003080                | 19 | 1221948   | 1222005   | 58   | 1 | 0   | 100 |
| STK11_Exon_2003761 + Exon_2003761 | 19 | 1219173   | 1219562   | 390  | 1 | 44  | 83  |
| STK11_Exon_2004755                | 19 | 1226453   | 1226662   | 210  | 1 | 0   | 100 |
| STK11_Exon_2006111                | 19 | 1222984   | 1223171   | 188  | 1 | 2   | 100 |
| STK11_exon_2007676                | 19 | 1205798   | 1207202   | 1405 | 4 | 0   | 79  |
| TP53                              | 17 | 7576500   | 7577633   | 1134 | 2 | 4   | 57  |
| TP53                              | 17 | 7578152   | 7578836   | 685  | 2 | 6   | 62  |
| TP53                              | 17 | 7579287   | 7579965   | 679  | 3 | 102 | 100 |
| TP53_Exon_1887091                 | 17 | 7590695   | 7590863   | 169  | 1 | 0   | 100 |
| TP53_Exon_1889309                 | 17 | 7571580   | 7573058   | 1479 | 3 | 8   | 61  |
| XRCC2_Exon_2186537                | 7  | 152357500 | 152357971 | 472  | 2 | 0   | 100 |
| XRCC2_Exon_2186839                | 7  | 152373126 | 152373250 | 125  | 1 | 0   | 100 |
| XRCC2_Exon_2187229                | 7  | 152345076 | 152346760 | 1685 | 4 | 6   | 70  |
| XRCC3                             | 14 | 104179187 | 104179330 | 144  | 1 | 0   | 100 |
| XRCC3                             | 14 | 104177345 | 104177929 | 585  | 2 | 0   | 70  |
| XRCC3                             | 14 | 104163929 | 104165938 | 2010 | 8 | 16  | 100 |
| XRCC3_Exon_2172917                | 14 | 104181761 | 104181823 | 63   | 1 | 0   | 100 |
| XRCC3_Exon_2173057                | 14 | 104174859 | 104174996 | 138  | 1 | 4   | 100 |
| XRCC3_Exon_2173171                | 14 | 104169510 | 104169664 | 155  | 1 | 0   | 100 |
| XRCC3_Exon_2176234                | 14 | 104173340 | 104173552 | 213  | 1 | 2   | 100 |
